# Supplementary material for: Ascorbic acid-mediated solid-state synthesis of cavity-engineered CuO–Cu 2 O–Cu heterostructures: structural transformation mechanism and photocatalytic detoxification of Cr( vi )
Source: Royal Society of Chemistry journal article supplement (doi:10.1039/d5ra09131d), 2026-01-01
Supplement: d5ra09131d1.pdf [file d5ra09131d1.pdf]

## Supplementary Information

### **Ascorbic Acid–Mediated Solid-State Synthesis of Cavity-Engineered CuO–Cu<sub>2</sub>O–Cu Heterostructures: Structural Transformation Mechanism and Photocatalytic Detoxification of Cr(VI)**

Mona S. NourEldien<sup>1\*</sup>, Mostafa Y. Nassar<sup>2\*</sup>

<sup>1</sup>Department of Chemistry, Faculty of Science, Benha University, Benha 13518, Egypt

<sup>2</sup>Department of Chemistry, College of Science, King Faisal University, Al-Ahsa 31982, Saudi Arabia

**\*Corresponding authors.**

E-mail address: mona.nourelidin@fsc.bu.edu.eg, Tel: +20 01129618280 (M.S.N.).

Email address: mynassar@kfu.edu.sa. Tel: 00966538871438 (M.Y.N.).

## S1. Characterization of CuO–Cu<sub>2</sub>O–Cu Heterostructures

Samples were characterized as follows; X-ray diffraction (XRD): Bruker D8 Advance, Cu K $\alpha$  ( $\lambda = 1.5406 \text{ \AA}$ ),  $2\theta$  range  $10^\circ$ – $80^\circ$ , step size  $0.02^\circ$ , counting time 1 s/step. Phase identification used JCPDS cards; crystallite sizes were estimated from FWHM of selected

peaks using the Scherrer equation  $D = \frac{K\lambda}{\beta \cos \theta}$  with  $K = 0.9$ . Reported  $\beta$  values were corrected for instrumental broadening using a Si standard. Fourier transform infrared (FT-IR): Thermo Nicolet iS10,  $4000$ – $400 \text{ cm}^{-1}$ ,  $4 \text{ cm}^{-1}$  resolution, 32 scans, KBr pellet method. Assignments follow references cited in the text. X-ray photoelectron spectroscopy (XPS): Thermo Fisher with Al K $\alpha$  radiation ( $h\nu = 1486.6 \text{ eV}$ , resolution  $\sim 0.5 \text{ eV}$  at pass energy  $20 \text{ eV}$ ). Survey spectra were collected in the  $-10$  to  $1350 \text{ eV}$  range spot size  $400 \text{ }\mu\text{m}$ , at a pressure of  $10 \text{ mbar}$  with a full spectrum pass energy of  $200 \text{ eV}$  and at a narrow spectrum of  $50 \text{ eV}$ . A low-energy electron flood gun was used for charge neutralization during acquisition, and binding energies were calibrated with respect to the C  $1s$  peak at  $284.8 \text{ eV}$ . Relative atomic concentrations and oxidation states are reported. FE-SEM and EDX: Quanta 250 FEG at  $5$ – $15 \text{ kV}$  for morphology and elemental mapping. HR-TEM & SAED: JEOL JEM-2100 at  $200 \text{ kV}$ . Sample preparation used ethanol dispersion on lacey carbon grids. N<sub>2</sub> adsorption/desorption isotherms at  $77 \text{ K}$  were employed to examine the textural surface characteristics and pore size distribution using a BELSORP36 analyzer (JP. BEL Co., Ltd). UV–vis diffuse reflectance spectroscopy (DRS): Jasco V-670 with integrating sphere, BaSO<sub>4</sub> reference. Reflectance  $R(\lambda)$  converted to Kubelka–Munk function  $F(R)$  for Tauc analysis. Tauc plots were constructed using  $(F(R)h\nu)^n$  versus  $h\nu$ . Electron paramagnetic resonance (EPR) measurements were performed on a Bruker EMXPLUS spectrometer. The point of zero charge ( $\text{pH}_{\text{pzc}}$ ) of the CuO–Al<sub>1.1</sub> catalyst was determined using the pH drift method. Briefly, a series of NaCl aqueous solutions ( $0.01 \text{ M}$ ) were prepared, and their initial pH values ( $\text{pH}_i$ ) were adjusted in the range of  $2$ – $10$  using dilute HCl or NaOH. A fixed amount of catalyst ( $0.01 \text{ g}$ ) was then added to each solution, and the suspensions were stirred and allowed to equilibrate at room temperature for  $24 \text{ h}$ . The final pH values ( $\text{pH}_f$ ) were measured, and the  $\text{pH}_{\text{pzc}}$  was determined from the intersection point where  $\Delta\text{pH}$  equals zero.

## S2. Electrochemical Impedance Spectroscopy Measurements

EIS measurements were conducted using an electrochemical analyzer (model: CHI608D, CH Instruments, Austin, USA) over  $100 \text{ Hz}$ – $300 \text{ kHz}$  to probe the electrical properties of the samples. Pellets coated with conductive electrodes were used to ensure good contact. The real

( $Z'$ ) and imaginary ( $Z''$ ) impedance components, along with the phase angle, were analyzed to evaluate resistive and capacitive behavior and assess interfacial charge-transfer efficiency.

### **S3 Experimental and Statistical Analysis**

All experimental runs were conducted in triplicate ( $n=3$ ) under each tested condition, and the results are presented as the mean  $\pm$  standard deviation (SD). Statistical analyses were performed using OriginPro 2019b (OriginLab Corporation, USA). For each experimental factor (solution concentration, pH, and catalyst dosage), descriptive statistics were first calculated to determine the mean, standard deviation, and standard error. The effects of these factors on Cr(VI) photoreduction efficiency were evaluated using one-way analysis of variance (ANOVA) at a 95% confidence level. Levene's test was used to verify homogeneity of variances, and Tukey's honest significant difference (HSD) test was used for post hoc pairwise comparisons among the treatment levels. Statistical significance was considered at  $p < 0.05$ . The use of one-way ANOVA was appropriate since each one-factor-at-a-time (OFAT) experiment involved varying a single factor at multiple levels while keeping all other conditions constant. For kinetic analysis, time-dependent concentration data ( $C_t/C_0$  vs. time) obtained from the batch photoreduction experiments were also analyzed in OriginPro 2019b. Each time-point measurement was conducted in triplicate, and the mean  $\pm$  SD values were used to generate kinetic plots. The pseudo-first-order kinetic model was fitted to the data by linear regression of  $\ln(C_t/C_0)$  versus time, and the apparent rate constant ( $k$ ,  $\text{min}^{-1}$ ) and coefficient of determination ( $R^2$ ) were obtained automatically from the regression statistics. The goodness of fit and reproducibility of the kinetic data were confirmed by the high  $R^2$  values and small standard deviations among replicates. The combination of OFAT experimental design, replicate data collection, and integrated statistical evaluation using ANOVA, Levene's, and Tukey's tests provided a robust and reproducible statistical validation of the results. The inclusion of all raw replicate data in Table S3 ensures transparency and reproducibility of the statistical results presented.

**Table S1.** List of Abbreviations and Symbols

| <b>Term / Symbol</b>   | <b>Definition / Meaning</b>                             |
|------------------------|---------------------------------------------------------|
| <b>Cr(VI)</b>          | Hexavalent Chromium                                     |
| <b>Cr(III)</b>         | Trivalent Chromium                                      |
| <b>CuO</b>             | Copper(II) Oxide                                        |
| <b>Cu<sub>2</sub>O</b> | Copper(I) Oxide / Cuprous Oxide                         |
| <b>Cu</b>              | Metallic Copper                                         |
| <b>CuO–A0.2</b>        | CuO reduced with 0.2 g ascorbic acid                    |
| <b>CuO–A0.5</b>        | CuO reduced with 0.5 g ascorbic acid                    |
| <b>CuO–A0.8</b>        | CuO reduced with 0.8 g ascorbic acid                    |
| <b>CuO–A1.1</b>        | CuO reduced with 1.1 g ascorbic acid (optimized sample) |
| <b>FESEM</b>           | Field Emission Scanning Electron Microscopy             |
| <b>HRTEM</b>           | High-Resolution Transmission Electron Microscopy        |
| <b>XPS</b>             | X-ray Photoelectron Spectroscopy                        |
| <b>OFAT</b>            | One-Factor-at-a-Time                                    |
| <b>ANOVA</b>           | Analysis of Variance                                    |
| <b>R<sup>2</sup></b>   | Coefficient of Determination                            |
| <b>XRD</b>             | X-ray Diffraction                                       |
| <b>FTIR</b>            | Fourier Transform Infrared Spectroscopy                 |
| <b>SEM</b>             | Scanning Electron Microscopy                            |
| <b>TEM</b>             | Transmission Electron Microscopy                        |
| <b>UV–Vis DRS</b>      | Ultraviolet–Visible Diffuse Reflectance Spectroscopy    |
| <b>EPR</b>             | Electron Paramagnetic Resonance                         |

| <b>Term / Symbol</b>                  | <b>Definition / Meaning</b>                                                         |
|---------------------------------------|-------------------------------------------------------------------------------------|
| <b>EIS</b>                            | Electrochemical Impedance Spectroscopy                                              |
| <b>R<sub>ct</sub></b>                 | Charge Transfer Resistance                                                          |
| <b>AA</b>                             | Ascorbic Acid                                                                       |
| <b>DPC</b>                            | 1,5-Diphenylcarbazine                                                               |
| <b>DI water</b>                       | Deionized Water                                                                     |
| <b>JCPDS</b>                          | Joint Committee on Powder Diffraction Standards                                     |
| <b>FWHM</b>                           | Full Width at Half Maximum ( $\beta$ )                                              |
| $\lambda$                             | Wavelength                                                                          |
| $\theta$                              | Bragg Angle                                                                         |
| <b>TG–FTIR</b>                        | Thermogravimetric–Fourier Transform Infrared Spectroscopy                           |
| <b>EDX</b>                            | Energy-Dispersive X-ray Spectroscopy                                                |
| <b>SAED</b>                           | Selected Area Electron Diffraction                                                  |
| <b>k</b>                              | Pseudo-First-Order Rate Constant                                                    |
| <b>IPA</b>                            | Isopropanol                                                                         |
| <b>BQ</b>                             | Benzoquinone                                                                        |
| <b><math>\cdot\text{O}_2^-</math></b> | Superoxide Radical                                                                  |
| <b><math>e^-</math></b>               | Electron                                                                            |
| <b><math>h^+</math></b>               | Hole                                                                                |
| <b><math>\cdot\text{OH}</math></b>    | Hydroxyl Radical                                                                    |
| <b>SD</b>                             | Standard Deviation                                                                  |
| <b>HSD</b>                            | Honest Significant Difference                                                       |
| <b>F</b>                              | F-statistic (the ratio of variances used in ANOVA to test the overall significance) |

| <b>Term / Symbol</b>       | <b>Definition / Meaning</b>                                                                                        |
|----------------------------|--------------------------------------------------------------------------------------------------------------------|
| <b>Root MSE</b>            | Root Mean Square Error                                                                                             |
| <b><math>\alpha</math></b> | Alpha level (the significance level, typically 0.05, used as a threshold for determining statistical significance) |
| <b>n</b>                   | Sample size (number of replicates or independent observations)                                                     |
| <b>p</b>                   | p-value (the probability that the observed results occurred by chance; indicates statistical significance)         |
| <b><math>C_0</math></b>    | Initial Concentration                                                                                              |
| <b><math>C_t</math></b>    | Concentration at time t                                                                                            |
| <b>pH</b>                  | Potential of Hydrogen (acidity/basicity)                                                                           |
| <b>TDS</b>                 | Total Dissolved Solids                                                                                             |
| <b>CB</b>                  | Conduction Band                                                                                                    |
| <b>VB</b>                  | Valence Band                                                                                                       |
| <b><math>E_{VB}</math></b> | Valence Band Energy                                                                                                |
| <b><math>E_{CB}</math></b> | Conduction Band Energy                                                                                             |
| <b>NHE</b>                 | Normal Hydrogen Electrode                                                                                          |
| <b>TMOs</b>                | Transition Metal Oxides                                                                                            |
| <b>LED</b>                 | Light Emitting Diode                                                                                               |
| <b>rpm</b>                 | Revolutions Per Minute                                                                                             |
| <b><math>h\nu</math></b>   | Photon Energy                                                                                                      |
| <b><math>E_g</math></b>    | Band Gap Energy                                                                                                    |
| <b>F(R)</b>                | Kubelka-Munk Function                                                                                              |

**Table S2.** Yield of CuO–Cu<sub>2</sub>O–Cu heterostructures obtained via solid-state reduction of 1.0 g CuO with different ascorbic acid masses

| Sample ID | CuO (g) | Ascorbic acid (g) | Product mass (g)<br>(Run 1/2/3) | Yield (%)<br>(Run 1/2/3) |
|-----------|---------|-------------------|---------------------------------|--------------------------|
| CuO–A0.2  | 1       | 0.2               | 0.91 /0.93 /0.915               | 91 /93 /91.1             |
| CuO–A0.5  | 1       | 0.5               | 0.96 /0.968/ 0.954              | 96/ 96.8 /95.4           |
| CuO–A0.8  | 1       | 0.8               | 0.962 /0.975 /0.97              | 96.2/ 97.5/ 97           |
| CuO–A1.1  | 1       | 1.1               | 0.981 /0.99/0.97                | 98.1/ 99/ 97             |

**Table S3.** Raw experimental data for Cr(VI) photoreduction under different conditions (n = 3 replicates per condition).

| Series                                   | Condition | Run 1 | Run 2 | Run 3 | ±SD  | Mean (%) |
|------------------------------------------|-----------|-------|-------|-------|------|----------|
| <b>Concentration (mg L<sup>-1</sup>)</b> | 15        | 100   | 100   | 99.91 | 0.05 | 99.97    |
|                                          | 25        | 100   | 100   | 99.4  | 0.35 | 99.80    |
|                                          | 35        | 97.43 | 94.43 | 99.60 | 2.60 | 97.15    |
|                                          | 45        | 77.04 | 74.00 | 80.00 | 3.00 | 77.01    |
| <b>pH</b>                                | 2.5       | 100   | 97    | 100   | 1.73 | 99.00    |
|                                          | 3.5       | 81.27 | 78    | 84    | 3.00 | 81.09    |
|                                          | 5.8       | 31    | 28    | 34    | 3.00 | 31.00    |
|                                          | 8         | 24.74 | 25    | 24    | 0.52 | 24.58    |
| <b>Catalyst Dosage (mg)</b>              | 20        | 100   | 97    | 100   | 1.73 | 99.00    |
|                                          | 30        | 100   | 100   | 99.4  | 0.35 | 99.80    |
|                                          | 50        | 99.02 | 98.5  | 99.5  | 0.50 | 99.01    |

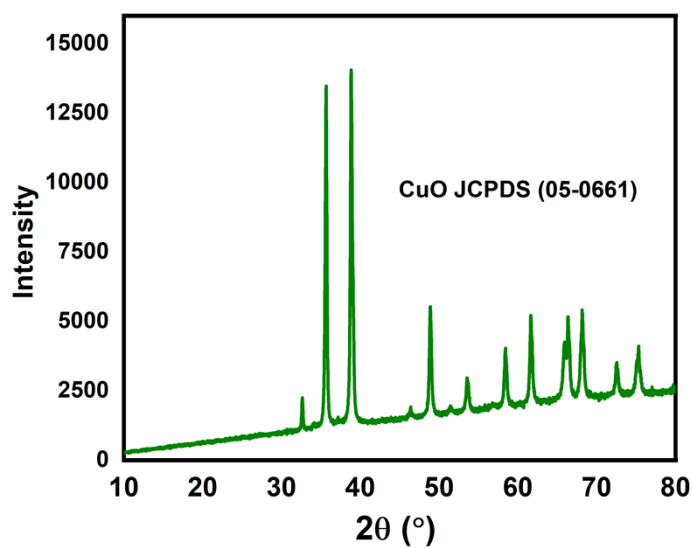

**Fig. S1.** XRD pattern of the control CuO sample calcined at 350 °C for 1 h in a covered crucible without ascorbic acid.

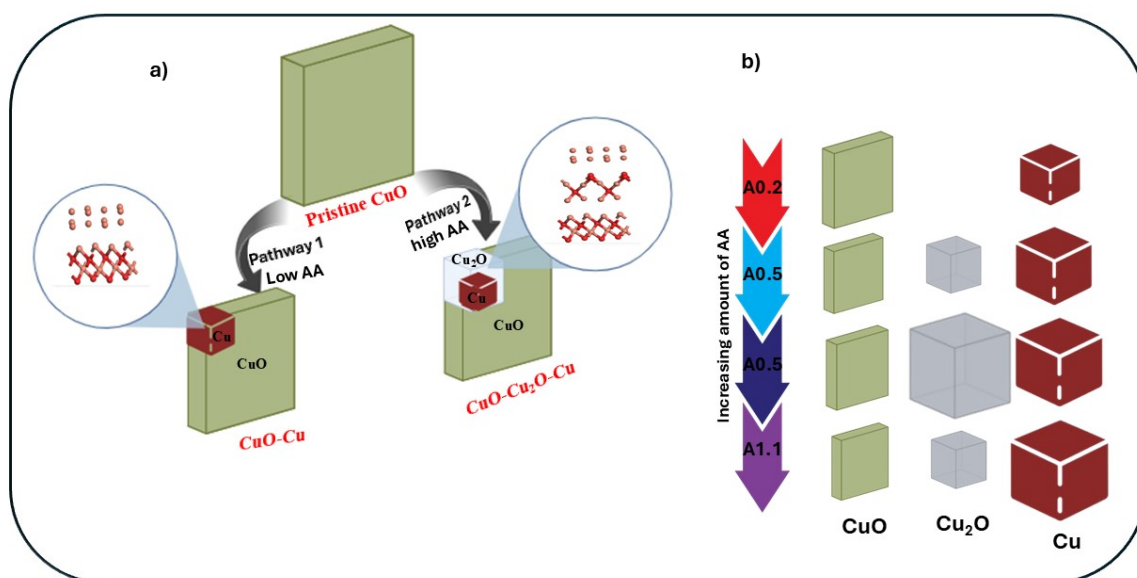

**Scheme S1** Evolution of phase-specific crystallite sizes in Cu-Cu<sub>2</sub>O-CuO heterostructures calculated from the Scherrer equation (a), and stepwise formation of Cu-Cu<sub>2</sub>O-CuO heterostructures via sequential reduction of CuO by ascorbic acid (b).



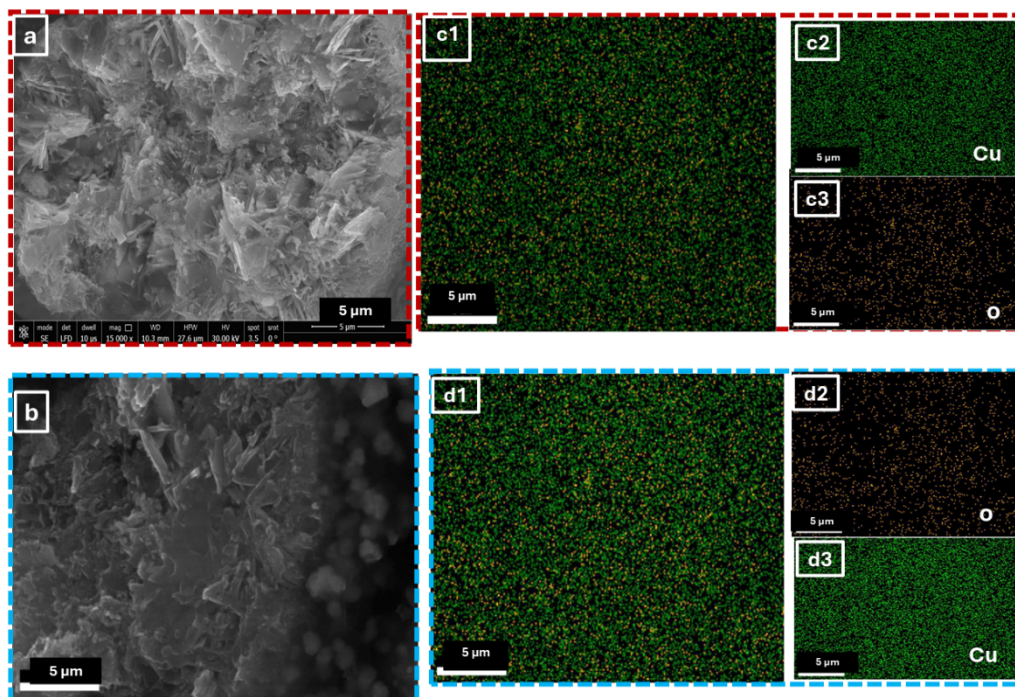

**Fig. S2.** SEM images of (a) CuO-A0.5 at high magnifications with corresponding elemental mapping (c1–c3). SEM images of (b) CuO-A1.1 at high magnifications with elemental mapping (d1–d3).

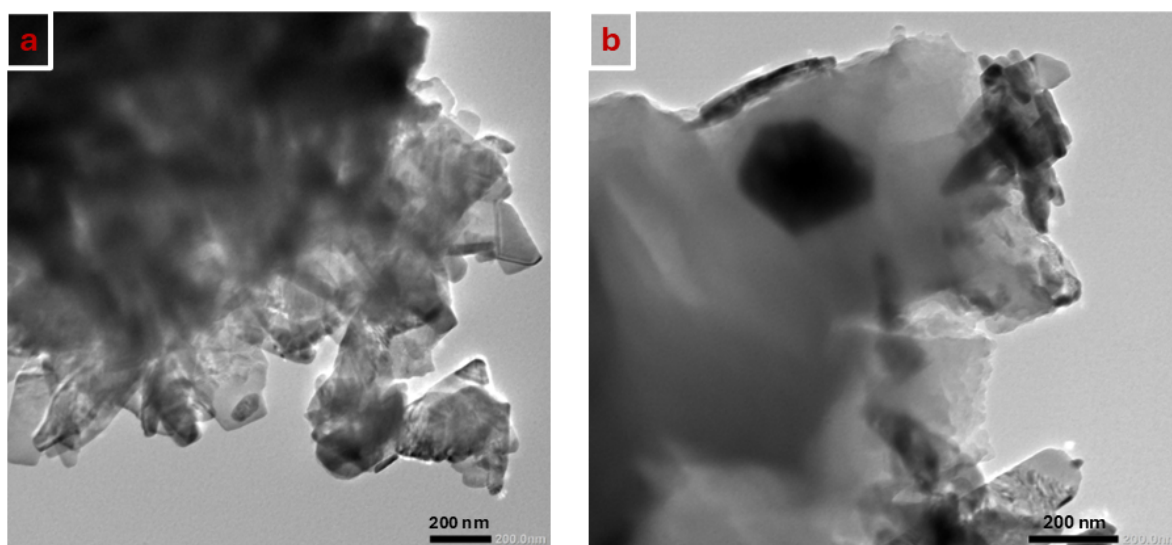

**Fig. S3.** TEM images of CuO-A0.5 (a) and CuO-A1.1 (b), at high magnifications.

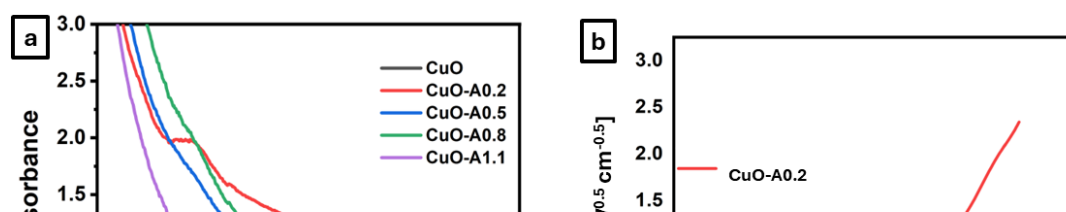

**Fig. S4.** UV–Vis absorption spectra (a), and Tauc plots for band gap estimation of CuO–Cu<sub>2</sub>O–Cu heterostructure (b-d).

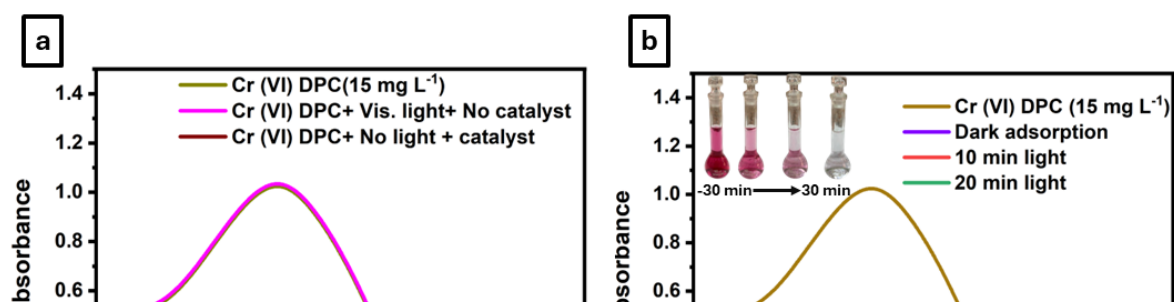

**Fig. S5.** Control experiments for Cr(VI) reduction: (a) without catalyst under visible light and with catalyst in the dark; (b) with the CuO–A1.1 catalyst under visible-light irradiation.

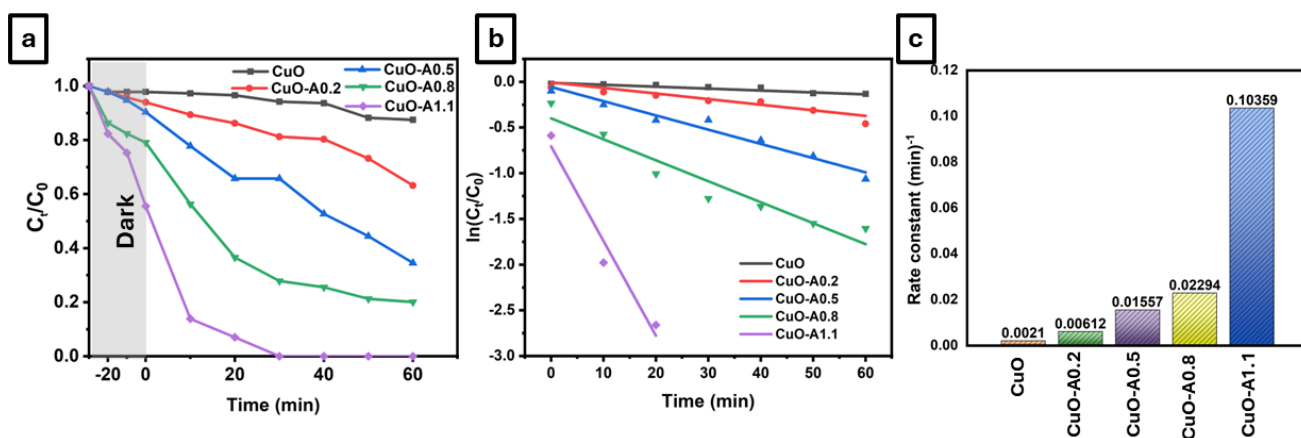

**Fig. S6.** Photocatalytic reduction of Cr(VI) under visible light irradiation: (a) performance of different CuO-Cu<sub>2</sub>O-Cu catalysts, (b) pseudo-first-order kinetic plots, (c) apparent rate constants. (Cr(VI) concentration: 25 mg L<sup>-1</sup>; catalyst dosage: 20 mg; PH 2.5; all tests performed in the presence of methanol).

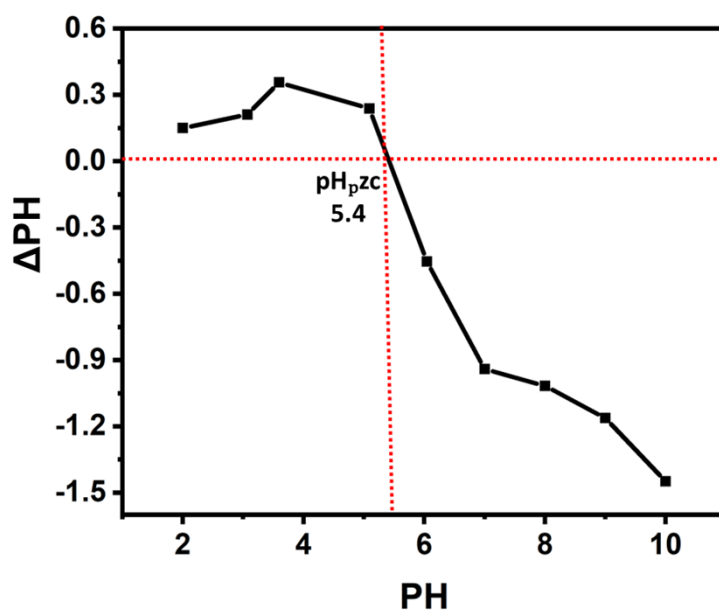

**Fig. S7.** Determination of the point of zero charge ( $\text{pH}_{\text{pzc}}$ ) of CuO–Al<sub>1.1</sub> by the pH drift method.

**Table S4.** Descriptive statistics for Cr(VI) photoreduction under varying Cr(VI) concentrations, pH values, and catalyst dosages.

| Conc (mg L <sup>-1</sup> ) | N Analysis | N Missing | Mean     | Standard Deviation | SE of Mean |
|----------------------------|------------|-----------|----------|--------------------|------------|
| 15                         | 3          | 0         | 99.97    | 0.05196            | 0.03       |
| 25                         | 3          | 0         | 99.8     | 0.34641            | 0.2        |
| 35                         | 3          | 0         | 97.15267 | 2.59655            | 1.49912    |
| 45                         | 3          | 0         | 77.013   | 3.00008            | 1.7321     |
| PH                         | N Analysis | N Missing | Mean     | Standard Deviation | SE of Mean |
| 2.5                        | 3          | 0         | 99       | 1.73205            | 1          |
| 3.5                        | 3          | 0         | 81.08867 | 3.00393            | 1.73432    |
| 5.8                        | 3          | 0         | 31       | 3                  | 1.73205    |
| 8                          | 3          | 0         | 24.58    | 0.51884            | 0.29956    |
| Dosage (mg)                | N Analysis | N Missing | Mean     | Standard Deviation | SE of Mean |
| 20                         | 3          | 0         | 99       | 1.73205            | 1          |
| 30                         | 3          | 0         | 99.8     | 0.34641            | 0.2        |
| 50                         | 3          | 0         | 99.00667 | 0.50013            | 0.28875    |

**Table S5.** One-way ANOVA results for the effect of concentration, pH, and catalyst dosage on Cr(VI) photoreduction efficiency.

| <b>Conc (mg L<sup>-1</sup>)</b> | <b>DF</b> | <b>Sum of Squares</b> | <b>Mean Square</b> | <b>F Value</b> | <b>Prob&gt;F</b> |
|---------------------------------|-----------|-----------------------|--------------------|----------------|------------------|
| Model                           | 3         | 1100.13902            | 366.71301          | 92.4567        | 1.50E-06         |
| Error                           | 8         | 31.73057              | 3.96632            |                |                  |
| Total                           | 11        | 1131.8696             |                    |                |                  |

  

| <b>PH</b> | <b>DF</b> | <b>Sum of Squares</b> | <b>Mean Square</b> | <b>F Value</b> | <b>Prob&gt;F</b> |
|-----------|-----------|-----------------------|--------------------|----------------|------------------|
| Model     | 3         | 12169.85445           | 4056.61815         | 762.06435      | 3.63E-10         |
| Error     | 8         | 42.58557              | 5.3232             |                |                  |
| Total     | 11        | 12212.44002           |                    |                |                  |

  

| <b>Dosage (mg)</b> | <b>DF</b> | <b>Sum of Squares</b> | <b>Mean Square</b> | <b>F Value</b> | <b>Prob&gt;F</b> |
|--------------------|-----------|-----------------------|--------------------|----------------|------------------|
| Model              | 2         | 1.26942               | 0.63471            | 0.565          | 0.59591          |
| Error              | 6         | 6.74027               | 1.12338            |                |                  |
| Total              | 8         | 8.00969               |                    |                |                  |

**Table S6.** Fit Statistics for One-way ANOVA results for the effect of concentration, pH, and catalyst dosage on Cr(VI) photoreduction efficiency.

|           | <b>PH</b> | <b>Conc. (mg L<sup>-1</sup>)</b> | <b>Dosage (mg)</b> |
|-----------|-----------|----------------------------------|--------------------|
| R-Square  | 0.99651   | 0.97197                          | 0.15849            |
| Coeff Var | 0.03916   | 0.0213                           | 0.01068            |
| Root MSE  | 2.30721   | 1.99156                          | 1.0599             |
| Data Mean | 58.91717  | 93.48392                         | 99.26889           |

**Table S7.** Tukey's HSD pairwise comparison test for mean differences between factor levels.

| <b>Conc (mg L<sup>-1</sup>)</b> | <b>MeanDiff</b> | <b>SEM</b> | <b>q Value</b> | <b>Prob</b> | <b>Alpha</b> | <b>Sig</b> | <b>LCL</b> | <b>UCL</b> |
|---------------------------------|-----------------|------------|----------------|-------------|--------------|------------|------------|------------|
| 25 - 15                         | -0.17           | 1.63       | 0.15           | 1.00        | 0.05         | 0.00       | -5.38      | 5.04       |
| 35 - 15                         | -2.82           | 1.63       | 2.45           | 0.37        | 0.05         | 0.00       | -8.02      | 2.39       |
| 35 - 25                         | -2.65           | 1.63       | 2.30           | 0.42        | 0.05         | 0.00       | -7.85      | 2.56       |
| 45 - 15                         | -22.96          | 1.63       | 19.97          | 0.00        | 0.05         | 1.00       | -28.16     | -17.75     |
| 45 - 25                         | -22.79          | 1.63       | 19.82          | 0.00        | 0.05         | 1.00       | -27.99     | -17.58     |
| 45 - 35                         | -20.14          | 1.63       | 17.52          | 0.00        | 0.05         | 1.00       | -25.35     | -14.93     |
| <b>PH</b>                       | <b>MeanDiff</b> | <b>SEM</b> | <b>q Value</b> | <b>Prob</b> | <b>Alpha</b> | <b>Sig</b> | <b>LCL</b> | <b>UCL</b> |
| 3.5 - 2.5                       | -17.91          | 1.88       | 13.45          | 0.00        | 0.05         | 1.00       | -23.94     | -11.88     |
| 5.8 - 2.5                       | -68.00          | 1.88       | 51.05          | 0.00        | 0.05         | 1.00       | -74.03     | -61.97     |
| 5.8 - 3.5                       | -50.09          | 1.88       | 37.60          | 0.00        | 0.05         | 1.00       | -56.12     | -44.06     |
| 8 - 2.5                         | -74.42          | 1.88       | 55.87          | 0.00        | 0.05         | 1.00       | -80.45     | -68.39     |
| 8 - 3.5                         | -56.51          | 1.88       | 42.42          | 0.00        | 0.05         | 1.00       | -62.54     | -50.48     |
| 8 - 5.8                         | -6.42           | 1.88       | 4.82           | 0.04        | 0.05         | 1.00       | -12.45     | -0.39      |
| <b>Dosage (mg)</b>              | <b>MeanDiff</b> | <b>SEM</b> | <b>q Value</b> | <b>Prob</b> | <b>Alpha</b> | <b>Sig</b> | <b>LCL</b> | <b>UCL</b> |
| 30 - 20                         | 0.80            | 0.87       | 1.31           | 0.65        | 0.05         | 0.00       | -1.86      | 3.46       |
| 50 - 20                         | 0.01            | 0.87       | 0.01           | 1.00        | 0.05         | 0.00       | -2.65      | 2.66       |
| 50 - 30                         | -0.79           | 0.87       | 1.30           | 0.65        | 0.05         | 0.00       | -3.45      | 1.86       |

**Table S8.** Results of Levene's test for homogeneity of variances for the photoreduction efficiency data under different experimental conditions.

| <b>PH</b>                        | <b>DF</b> | <b>Sum of Squares</b> | <b>Mean Square</b> | <b>F Value</b> | <b>Prob&gt;F</b> |
|----------------------------------|-----------|-----------------------|--------------------|----------------|------------------|
| Model                            | 3         | 5.45309               | 1.8177             | 1.20338        | 0.36894          |
| Error                            | 8         | 12.08389              | 1.51049            |                |                  |
| <b>Conc. (mg L<sup>-1</sup>)</b> | <b>DF</b> | <b>Sum of Squares</b> | <b>Mean Square</b> | <b>F Value</b> | <b>Prob&gt;F</b> |
| Model                            | 3         | 9.41395               | 3.13798            | 2.63777        | 0.12126          |
| Error                            | 8         | 9.51707               | 1.18963            |                |                  |
| <b>Dosage (mg)</b>               | <b>DF</b> | <b>Sum of Squares</b> | <b>Mean Square</b> | <b>F Value</b> | <b>Prob&gt;F</b> |
| Model                            | 2         | 2.13397               | 1.06698            | 7.51998        | 0.02319          |
| Error                            | 6         | 0.85132               | 0.14189            |                |                  |

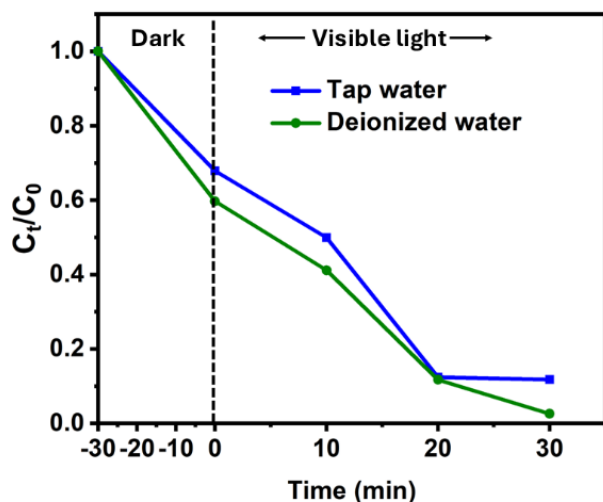

**Fig. S8.** Photocatalytic reduction of Cr(VI) in tap water using the CuO–A1.1. The tests were conducted in Cr(VI)-spiked tap water (conductivity = 290–350  $\mu\text{S cm}^{-1}$ , TDS = 191–231 ppm) containing common ions .g., ( $\text{Cl}^-$ ,  $\text{SO}_4^{2-}$ ,  $\text{HCO}_3^-$ ). Under identical experimental conditions to the deionized-water system (Cr(VI) = 35  $\text{mg L}^{-1}$ , catalyst dose = 0.02 g, pH = 2.5, 40 mL).

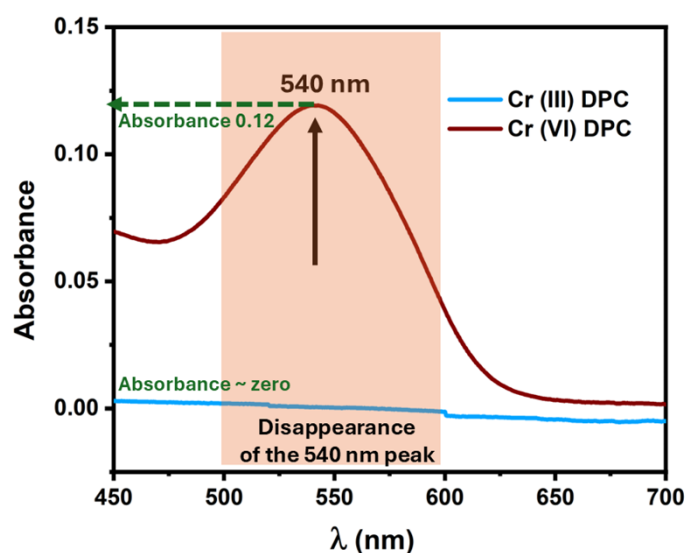

**Fig. S9.** UV–Vis spectra of Cr(VI)–DPC (540 nm) and Cr(III)–DPC, confirming photocatalytic reduction of Cr(VI) to Cr(III).

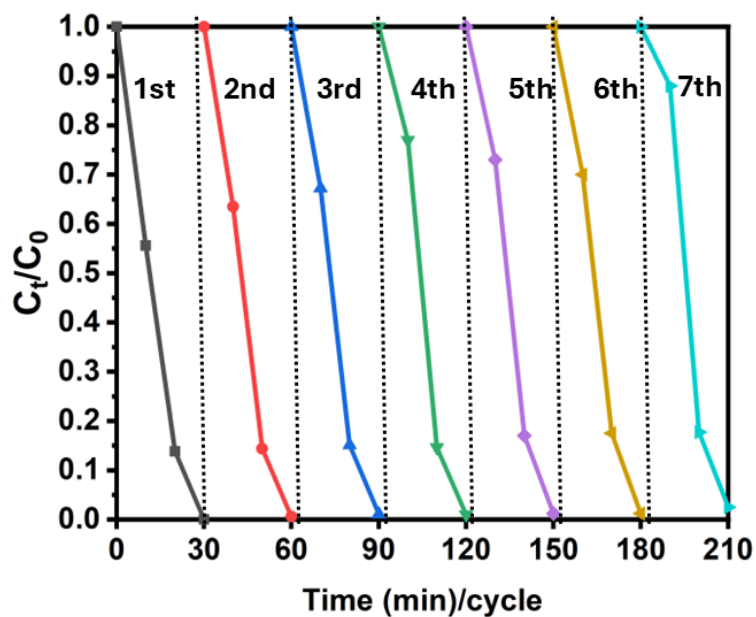

**Fig. S10.** Concentration profiles ( $C_t/C_0$  vs. time) for 7 consecutive photocatalytic cycles using the CuO-A1.1.

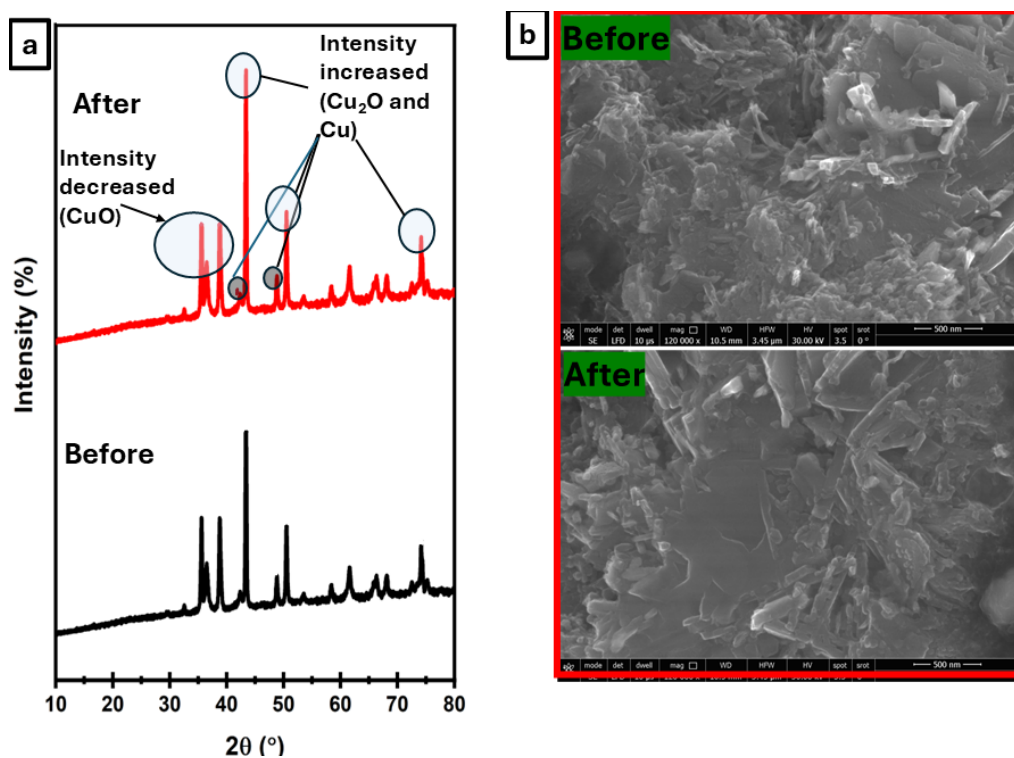

**Fig. S11.** Post-photocatalysis characterization of CuO-A1.1: XRD patterns (a), and SEM analysis (b).
